# Supplementary material
Source: Springer Nature journal article supplement (https://www.springermedizin.de/resource/supplementary/13099_2010_29_MOESM6_ESM.pdf/9665416)
Supplement: MOESM6 [file 9665416]

# Enteric Pathogens monitored in this study

## Bacteria

Classical Serotyping and  
Molecular Analysis

*V. cholerae* O1 and O139  
*V. cholerae* Non O1 and Non O139  
*V. parahaemolyticus*  
*V. fluvialis*

**Conventional Microbiology, Serotyping  
and PCR**

*Aeromonas* spp.

**Conventional Microbiology**

*Campylobacter jejuni*

*Campylobacter coli*

**Conventional Microbiology**

*Shigella dysenteriae*

*S. flexneri*

*S. sonnei*

*S. Boydii*

**Classical Microbiology + Serotyping**

*Salmonella*

EPEC

ETEC group (LT, ST, LT+ST)

EAEC, EIEC, STEC

**Classical Microbiology + PCR**

## Virus

PAGE, RT-PCR and Kit

Rotavirus

**PAGE & Rota Adeno Kit**

Adenovirus

**Rota Adeno Kit**

Norovirus GI

Norovirus GII

**RT-PCR**

Sapovirus

**RT-PCR**

Astrovirus

**RT-PCR**

## Parasites

Microscopic and  
Molecular Analysis

*Giardia lamblia*

**Capture ELISA and  
PCR**

*Cryptosporidium  
parvum*

**Capture ELISA and  
PCR**

*Entamoeba  
histolytica*

**Capture ELISA and  
PCR**

*Blastocyst  
hominis*

**Routine Microscopy**
